# Supplementary material for: Establishment of an Ex Vivo Tissue Culture Model for Evaluation of Antitumor Efficacy in Clear Cell Renal Cell Carcinoma
Source: PubMed Central journal article supplement (PMC9019348; doi:10.3389/fonc.2022.851191), 2022-04-06
Supplement: DataSheet_1.pdf [file DataSheet_1.pdf]

Figure S1

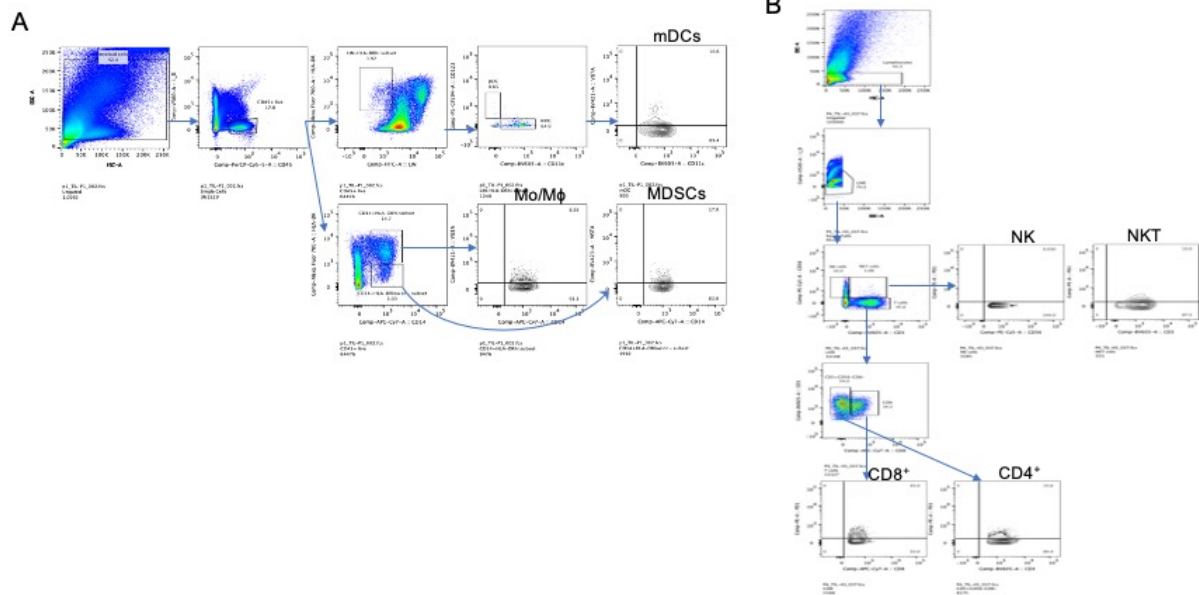

### Supplementary Figure legends

Figure S1. The gating strategy was shown. (A) The representative FACS image showing the gating strategy for myeloid cell subsets. (B) The representative FACS image showing the gating strategy for lymphocyte cell subsets.
